# Supplementary material
Source: PubMed Central journal article supplement (PMC8115680)
Supplement: 41396_2020_826_MOESM1_ESM.pdf [file 41396_2020_826_MOESM1_ESM.pdf]

## Plant part and a steep environmental gradient predict plant microbial composition in a tropical watershed

Jared Bernard, Christopher B. Wall, Maria S. Costantini, Randi L. Rollins, Melissa L. Atkins, Feresa P. Cabrera, Nicolas D. Cetraro, Christian K. J. Feliciano, Austin L. Greene, Philip K. Kitamura, Alejandro Olmedo-Velarde, Vithanage N. S. Sirimalwatta, Helen W. Sung, Leah P. M. Thompson, Huong T. Vu, Chad J. Wilhite, and Anthony S. Amend\*

---

\*Corresponding author: amend@hawaii.edu

### Supplementary Information

#### Supplemental methods

##### *Detailed sampling methods*

Aside from the air microhabitat type, we collected all samples with sterile cotton swabs (Puritan<sup>®</sup> Diagnostics LLC, Guilford, ME, USA). At each of the nine *Hibiscus tiliaceus* trees along our transect, the adaxial and abaxial surfaces of two leaves were sampled. Four different petioles, independent from the leaves sampled, were swabbed between the stem and the leaf base. Two axils of the stem and main branches were swabbed for 10 seconds on each individual. Near the main trunk of each tree, two stems with a circumference of approximately 3 cm were selected for sampling. The entire surface area of the selected stem was swabbed in 10 cm long sections. Root (rhizosphere) samples were collected by selecting an area of the root with diameter 1.2–3.8 cm, and buried 1–8 cm below the surface. The roots were unearthed carefully to not break the epidermis; then a length of 15–18 cm was swabbed across the root surface. The entire abaxial and adaxial surfaces were swabbed of one leaf found in the leaf litter under the sampled individual at each site. Leaf litter samples were standardized across sites by selecting *H. tiliaceus* leaves which met the following criteria: leaves found directly underneath branches of the *H. tiliaceus* tree, leaf size roughly  $6.35 \times 6.35$  cm, and leaf decomposition no more than 10% of total surface area. Once per site, we used a tubular soil sampler (1.5 cm diameter) to dig a 5-cm hole 1 m from extent of the canopy, which we used as an estimate to avoid sampling the rhizosphere. If the *H. tiliaceus* was adjacent to a stream, the sampling hole was on the opposite side of the tree to avoid runoff. We swabbed the sides and bottom of the hole. To avoid contamination, we sterilized the soil sampler between sites with 70% EtOH.

Air samplers were assembled following Quesada *et al.* (2018) with some modifications. The assembly procedure of one air sampler is as follows: A loop was made at the middle by twisting a 1.3 mm (16-gauge) thickness straightened metal rod about 20–25 cm long. Two standard

microscopic slides (Thermo Fisher Scientific, Waltham, MA, USA) were secured at two edges of the metal rod by using all-purpose glue and cable ties. Microscopic slides were surface sterilized with 10% bleach followed by 70% ethanol solutions inside a laminar flow. Then the slides were coated with a thin layer of silicone vacuum grease with a cotton swab. We then cut microtiter plate sealing film (Thermo Fisher Scientific, Waltham, MA, USA) into  $5.0 \times 1.5$  cm, which we positioned on the grease while exposing the bottom (white removable) layer of the film. Prepared traps were carefully placed in sterilized plastic bags until deployment in the field. At the site, each trap was assembled using battery-powered rotating garden motor (In the Breeze<sup>®</sup>, Bend, OR, USA). A pair of sterilized forceps was used to peel off the removable layer from the film so that the adhesive side remained exposed. The trap carefully hung on a branch using a metal rod approximately 1.2–1.5 m from the ground. The motor was covered with a plastic bag and an aluminum dish to protect from rain, wind and debris. The setup was kept in the field for 2 weeks prior to sample collection. During sample collection we used sterile forceps to remove the film from the slides and place in a 2 mL twist cap microcentrifuge tube, pre-filled with 1 mL of lysis buffer.

#### *PCR Parameters*

PCR parameters for ITS samples were as follows: 95°C for 3 min for denaturation; 35 cycles of 95°C for 20 sec, 53°C for 15 sec, 72°C for 30 sec; and 72°C for 3 min for final elongation. PCR parameters for 16S were as follows: 95°C for 3 min for denaturation; 35 cycles of 95°C for 20 sec, 50°C for 15 sec, 72°C for 30 sec; and 72°C for 3 min for final elongation.

#### **References**

Quesada T, Hughes J, Smith K, Shin K, James P, Smith J. A low-cost spore trap allows collection and real-time PCR quantification of airborne *Fusarium circinatum* spores. *Forests* 2018; **9**: 586.

Supplemental figures and tables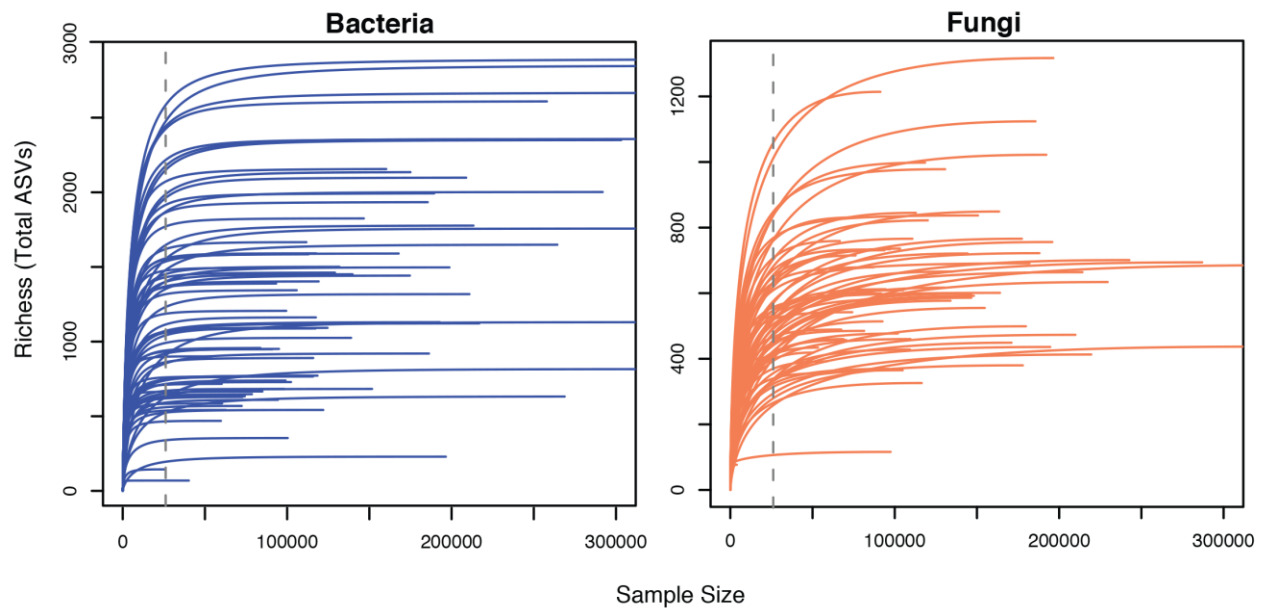

**Figure S1:** Rarefaction curves of bacterial and fungal ASVs detected with increasing sequencing depth. Each line represents a different biological sample. Dashed vertical lines indicate cut-off values for ASV subsetting used to achieve equal sequencing depth in the nestedness analyses (bacteria: 26 406; fungi: 20 000). All other analyses used the complete contingency table. The point at which a curve reaches an asymptote can be interpreted as the sequencing depth in which a census of taxa has been achieved.

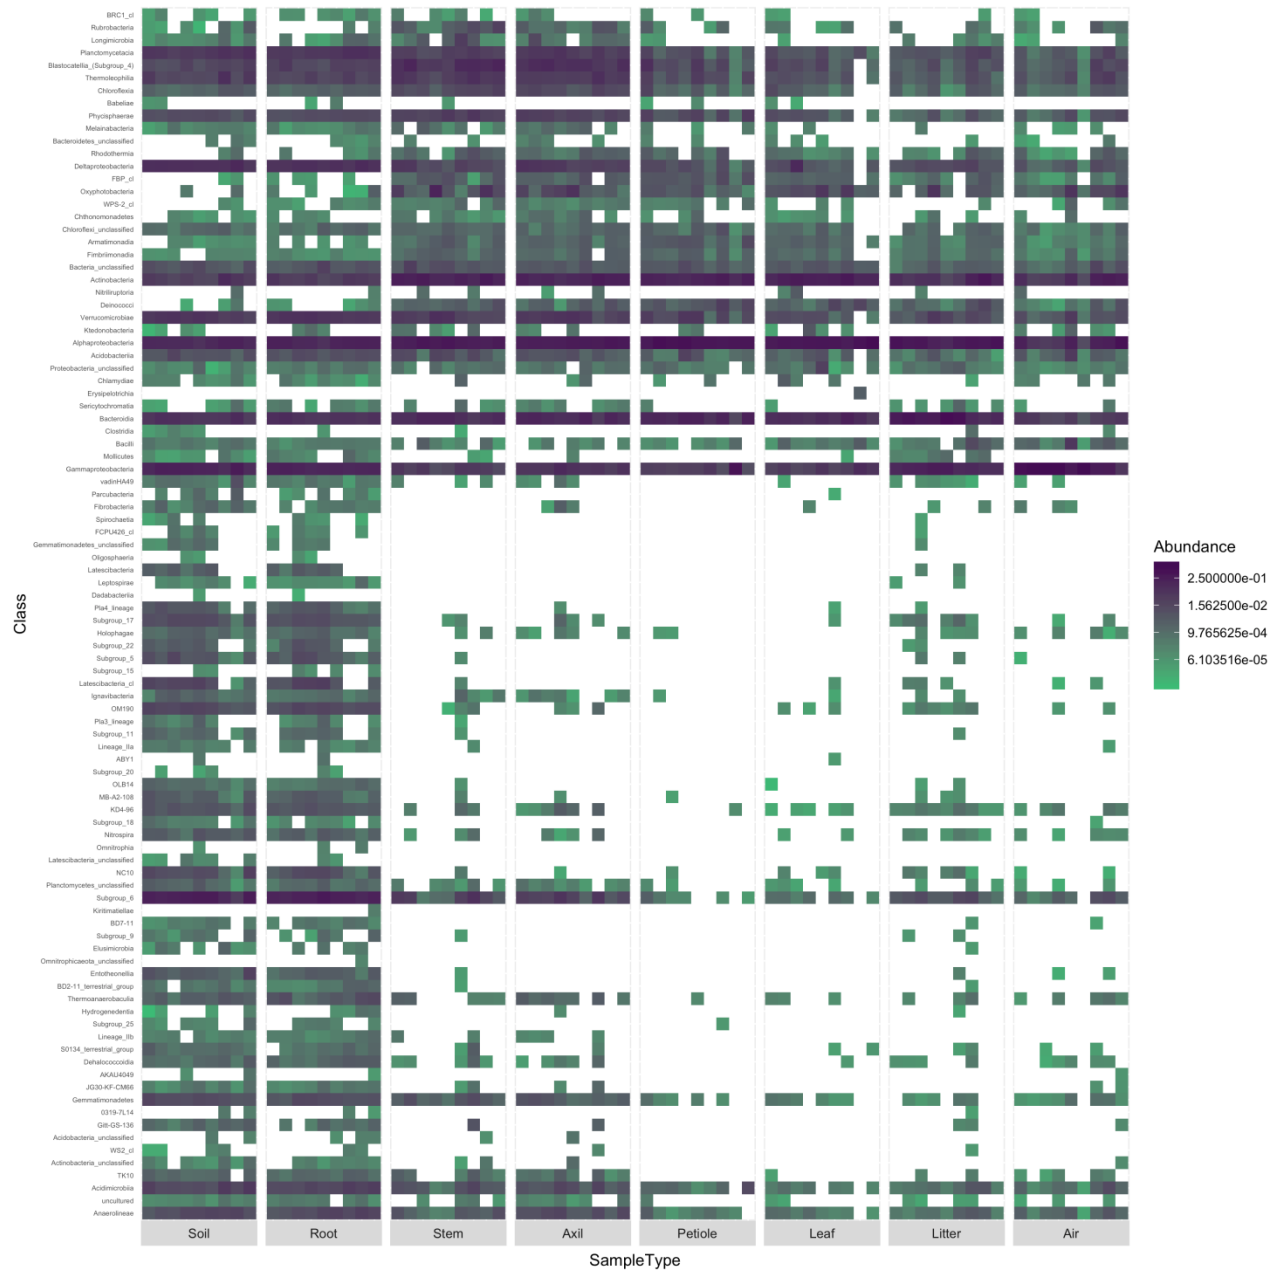

**Figure S2:** Heatmap of bacterial classes inhabiting *Hibiscus tiliaceus* in Waimea Valley, O‘ahu. Colors indicate abundance. Within each tissue microhabitat (*i.e.*, sample type), there are 9 blocks that represent sites along the environmental gradient, the leftmost being lowest in elevation and the rightmost being highest.

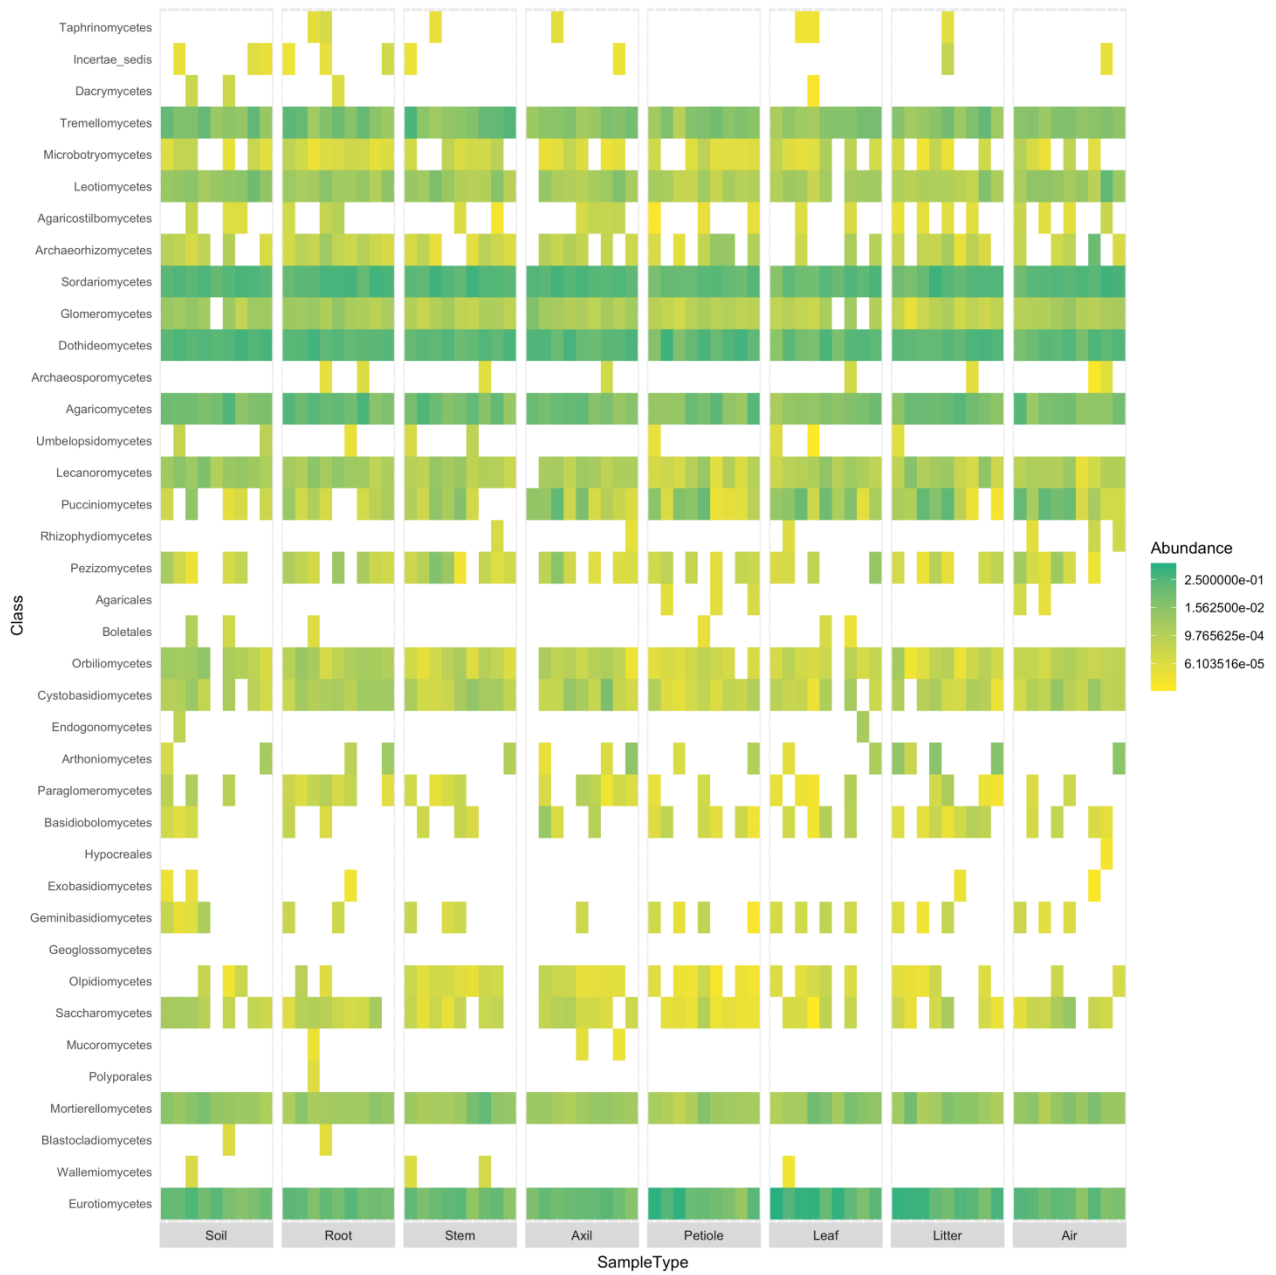

**Figure S3:** Heatmap of fungal classes inhabiting *Hibiscus tiliaceus* in Waimea Valley, O‘ahu. Colors indicate abundance. Within each tissue microhabitat (*i.e.*, sample type), there are 9 blocks that represent sites along the environmental gradient, the leftmost being lowest in elevation and the rightmost being highest.

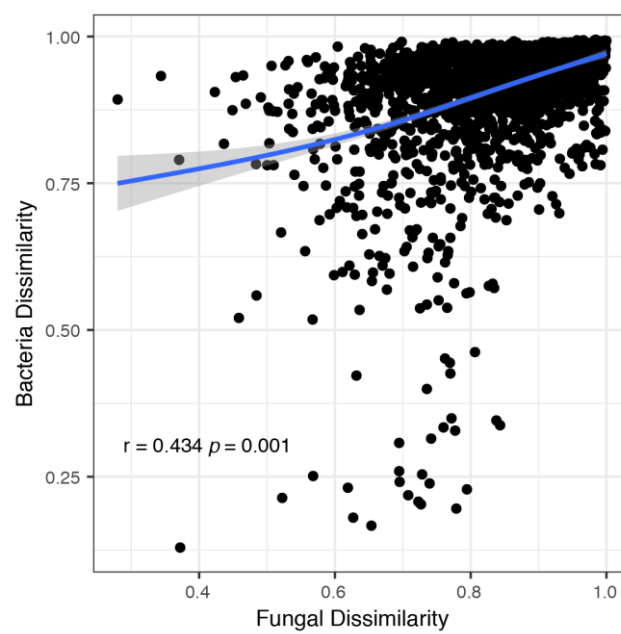

**Figure S4:** Mantel test of Bray-Curtis dissimilarity between bacterial and fungal communities inhabiting *Hibiscus tiliaceus* in Waimea Valley, O‘ahu. Each point represents a pairwise comparison between two biological samples. Blue line is a Loess curve fit to the scatter plot,  $r$ - and  $p$ -values refer to the Mantel statistic.

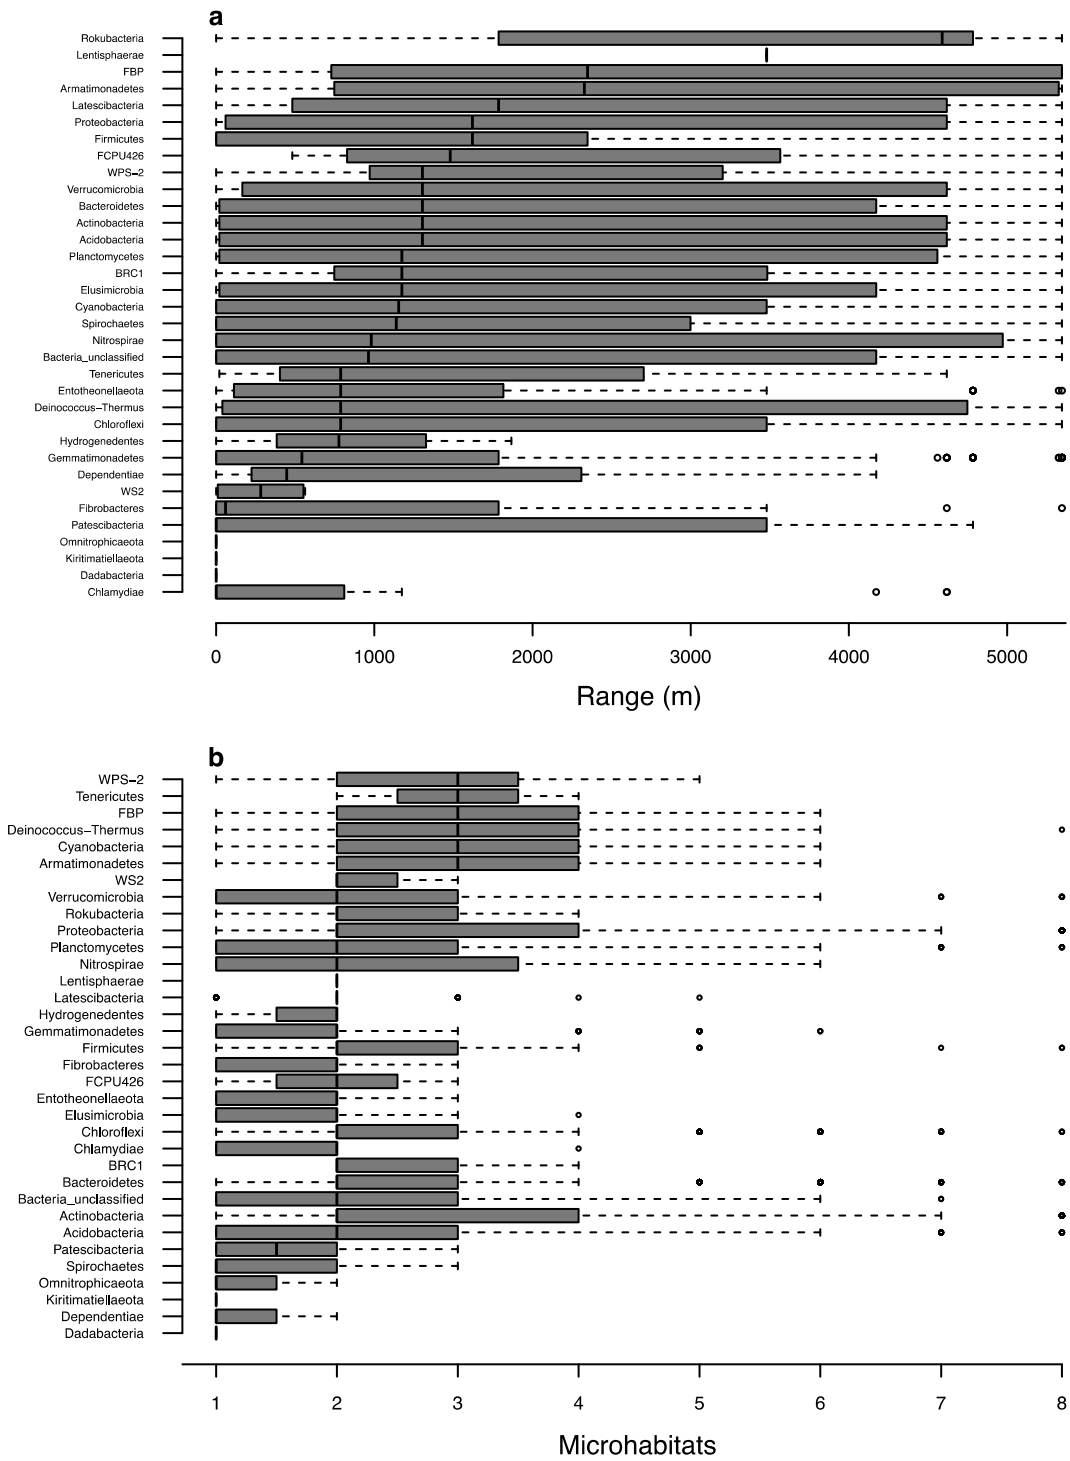

**Figure S5:** Spatial distribution of bacterial phyla on *Hibiscus tiliaceus* across Waimea Valley, O'ahu. **(a)** The range span (m) of each phylum across the sampling gradient (9 sites), and **(b)** the number of microhabitats where each bacterial phylum was observed.

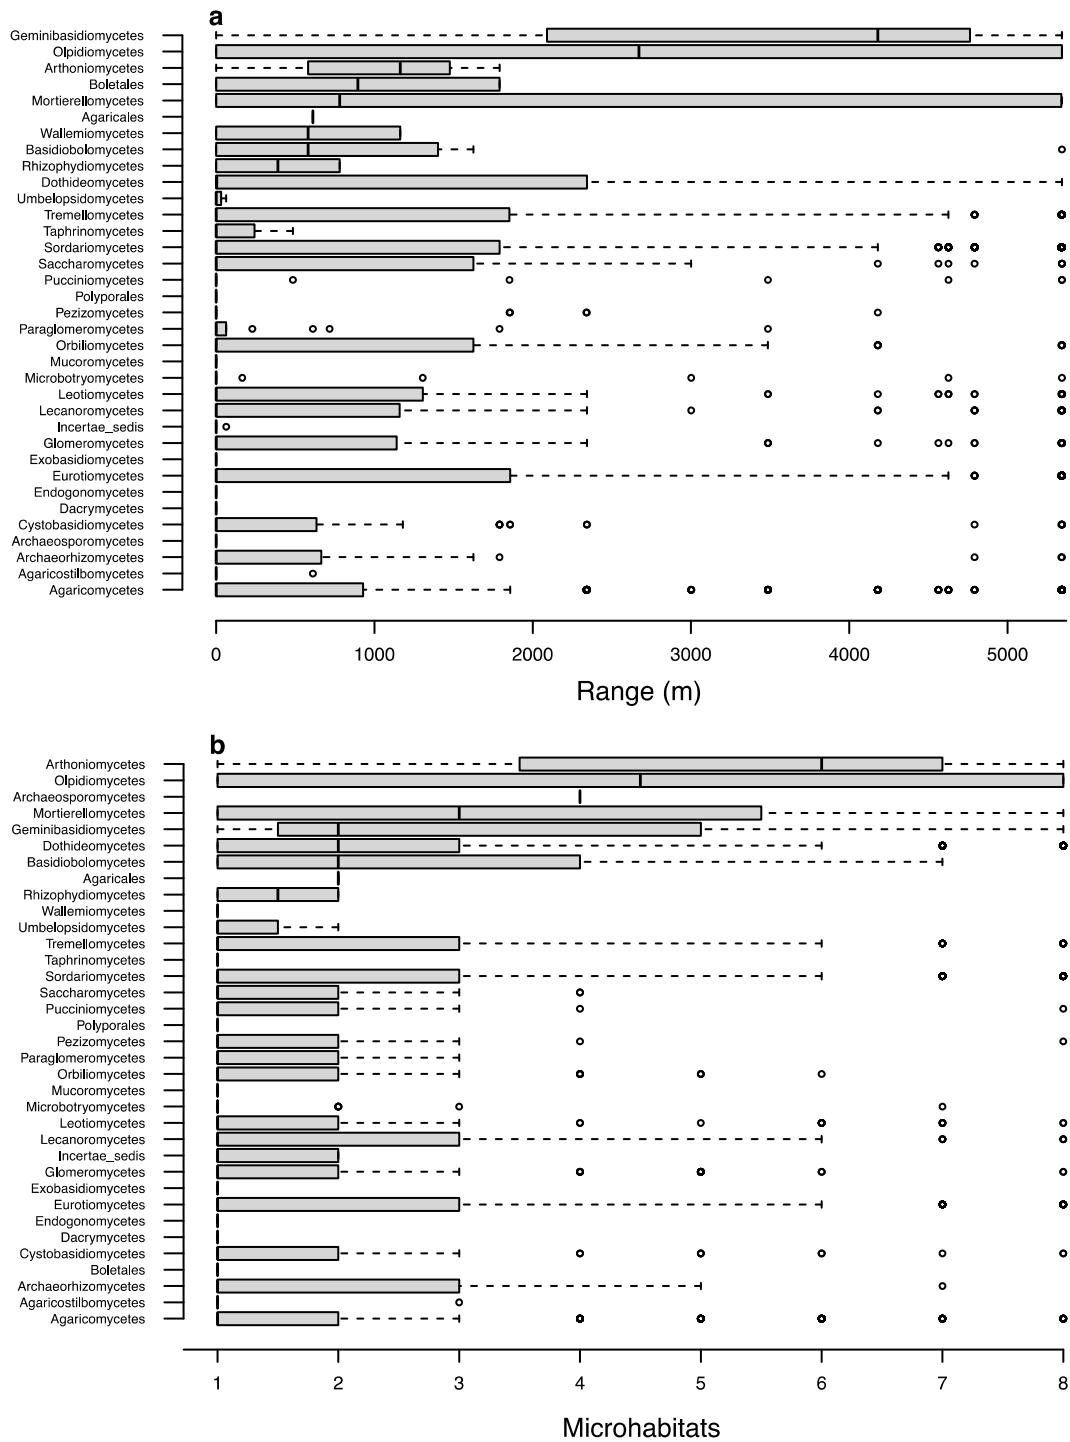

**Figure S6:** Spatial distribution of fungal classes on *Hibiscus tiliaceus* across Waimea Valley, O’ahu. (a) The range span (m) of each class across the sampling gradient (9 sites), and (b) the number of microhabitats where each fungal class was observed.



**Table S1:** Genus-level PERMANOVA analysis of compositional variance of microbial communities explained by microhabitat type or site (proxy for position along the environmental gradient).

| <i>Group</i>                     | <i>Variable</i> | <i>df</i> | <i>R</i> <sup>2</sup> | <i>p</i>         |
|----------------------------------|-----------------|-----------|-----------------------|------------------|
| <b>Bacteria</b> <sub>genus</sub> | Site            | 8         | 0.108                 | <b>&lt;0.001</b> |
|                                  | Microhabitat    | 7         | 0.541                 | <b>&lt;0.001</b> |
|                                  | Residual        | 56        |                       |                  |
| <b>Fungi</b> <sub>genus</sub>    | Site            | 8         | 0.248                 | <b>&lt;0.001</b> |
|                                  | Microhabitat    | 7         | 0.177                 | <b>&lt;0.001</b> |
|                                  | Residual        | 56        |                       |                  |

Significant *p*-values ( $p < 0.05$ ) in bold.

**Table S2:** PERMANOVA analysis of compositional variance explained by grouping microhabitat types into above- versus belowground categories.

| <i>Group</i>    | <i>Variable</i> | <i>df</i> | <i>R</i> <sup>2</sup> | <i>p</i>      |
|-----------------|-----------------|-----------|-----------------------|---------------|
| <b>Bacteria</b> | Ground type     | 1         | 0.147                 | <b>0.0001</b> |
|                 | Residual        | 70        |                       |               |
| <b>Fungi</b>    | Ground type     | 1         | 0.069                 | <b>0.0001</b> |
|                 | Residual        | 70        |                       |               |

Significant *p*-values ( $p < 0.05$ ) in bold.

**Table S3:** Mantel test of relationship between genus-level microbial community composition dissimilarity and geographic distance, for overall microbial community and also partitioned by microhabitat type and pooled above- or belowground microhabitats.

| <i>Group</i>                     | <i>Variable</i>    | <i>Mantel r</i> | <i>Corrected p</i> |
|----------------------------------|--------------------|-----------------|--------------------|
| <b>Bacteria</b> <sub>genus</sub> | Overall            | 0.045           | 0.440              |
|                                  | Aboveground        | 0.015           | 0.517              |
|                                  | Belowground        | 0.025           | 0.517              |
|                                  | Air                | 0.015           | 0.517              |
|                                  | Axil               | 0.043           | 0.517              |
|                                  | Leaf               | 0.024           | 0.517              |
|                                  | Litter             | 0.282           | 0.440              |
|                                  | Petiole            | -0.124          | 0.653              |
|                                  | <b>Root</b>        | <b>0.477</b>    | <b>0.022</b>       |
|                                  | Soil               | 0.025           | 0.517              |
|                                  | Stem               | 0.323           | 0.440              |
| <b>Fungi</b> <sub>genus</sub>    | <b>Overall</b>     | <b>0.251</b>    | <b>0.022</b>       |
|                                  | <b>Aboveground</b> | <b>0.425</b>    | <b>0.038</b>       |
|                                  | <b>Belowground</b> | <b>0.691</b>    | <b>0.038</b>       |
|                                  | <b>Air</b>         | <b>0.425</b>    | <b>0.038</b>       |
|                                  | Axil               | -0.097          | 0.597              |
|                                  | Leaf               | -0.034          | 0.557              |
|                                  | <b>Litter</b>      | <b>0.459</b>    | <b>0.038</b>       |
|                                  | <b>Petiole</b>     | <b>0.528</b>    | <b>0.038</b>       |
|                                  | Root               | 0.445           | 0.058              |
|                                  | <b>Soil</b>        | <b>0.691</b>    | <b>0.038</b>       |
|                                  | Stem               | 0.344           | 0.098              |

Significant *p*-values ( $p < 0.05$ ) in bold.
